# Supplementary material for: Impact of High-Intensity Circuit Resistance Exercise on Physical Fitness, Inflammation, and Immune Cells in Female Breast Cancer Survivors: A Randomized Control Trial
Source: MDPI journal article supplement (doi:10.3390/ijerph19095463), 2022-04-29
Supplement: s1 [file s1]

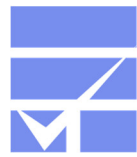

# CONSORT

TRANSPARENT REPORTING of TRIALS

## CONSORT 2020 Flow Diagram

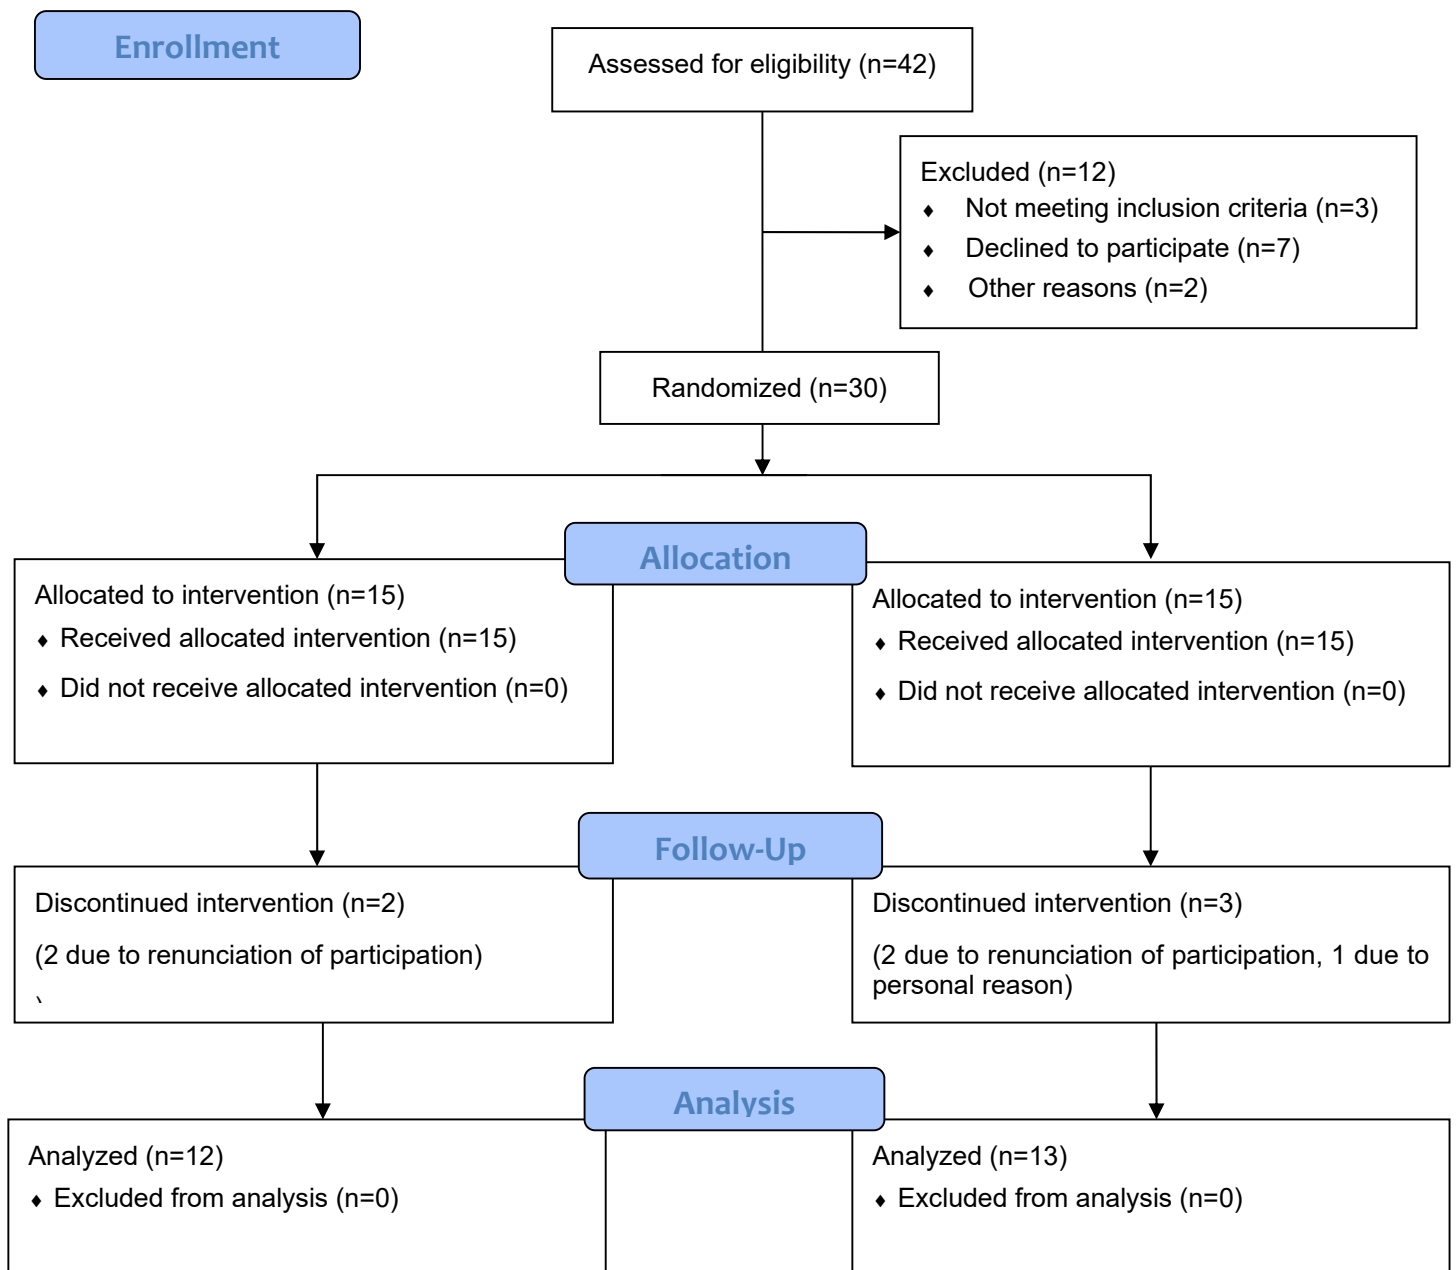

**Figure S1.** Consolidated Standards of Reporting Trials flow diagram.
